# Supplementary material for: De Novo Design of AC-P19M, a Novel Anticancer Peptide with Apoptotic Effects on Lung Cancer Cells and Anti-Angiogenic Activity
Source: MDPI journal article supplement (doi:10.3390/ijms232415594), 2022-12-09

## **Supplementary materials**

### **De novo design of AC-P19M, a novel anticancer peptide, with apoptotic effect on lung cancer cells and anti-angiogenic activity**

**Table S1. Six template sequences aligned from 15-mer to 20-mer anticancer peptides**

**Table S2. Representative results of functional prediction by machine learning-based web tools**

**Table S3. Minimum inhibitory concentration and minimum bactericidal concentration of AC-P19 and AC-P19M**

**Figure S1. Three-dimensional modeling of AC-P19 and AC-P19M**

**Figure S2. Cell cycle assay of A549 and H460 upon AC-P19M treatment**

**Figure S3. Field emission-scanning electron imaging of bacteria upon AC-P19M treatment**

Table S1. Six template sequences aligned from 15-mer to 20-mer anticancer peptides

| Peptide            | Aligned sequence     |                                                                                                       |
|--------------------|----------------------|-------------------------------------------------------------------------------------------------------|
| 15-mer             | FAKKIKGKIIKKVL       | 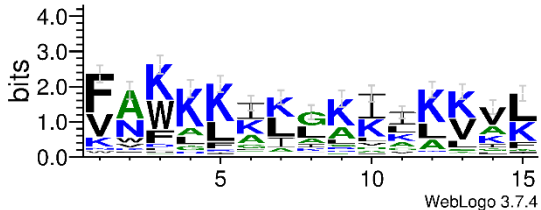<br>WebLogo 3.7.4   |
| 16-mer             | GLFDVIKKVASVIKKL     | <br>WebLogo 3.7.4   |
| 17-mer             | FLKKIVKKIKKHIKKAL    | <br>WebLogo 3.7.4  |
| 18-mer             | PAWRKAKRWAWRMLKAA    | <br>WebLogo 3.7.4 |
| 19-mer<br>(AC-P19) | FAKKLAKLKKKLAKLALAL  | <br>WebLogo 3.7.4 |
| 20-mer             | KWKLFKKIGIGLTLPPAKAY | <br>WebLogo 3.7.4 |

**Table S2. Representative results of functional prediction by machine learning-based web tools**

| Length<br>(AA) | Sequence                     | Anticancer activity |        |        | Cell penetrating activity |                    |        | Hemolysis |                         |        |
|----------------|------------------------------|---------------------|--------|--------|---------------------------|--------------------|--------|-----------|-------------------------|--------|
|                |                              | mACPpred            | ACPred | ENNACT | CellPPD                   | BChemRF-<br>CPPred | MLCPP  | HAPPENN   | DBAASP<br>(erythrocyte) | HemoPI |
| 15             | <u>FAKKIKGKIIKKVL*</u>       | 0.9768              | 1      | 1.000  | 0.05<br>(CPP)             | 87.05%             | 0.8758 | 0.012     | 0.76 (PPV)              | 0.47   |
|                | FAKKIKGKIIKKVR               | 0.9603              | 1      | 1.0    | 0.05<br>(CPP)             | 89.3%              | 0.9082 | 0.006     | 0.85 (PPV)              | 0.48   |
|                | FAKKIKGKIIKKVLR              | 0.9796              | 1      | 1.0    | 0.05<br>(CPP)             | 89.37%             | 0.9186 | 0.012     | 0.85 (PPV)              | 0.47   |
| 16             | <u>GLFDVIKKVASVIKKL</u>      | 0.9827              | 1      | 1.000  | 0.05<br>(CPP)             | 70.16%             | 0.4522 | 0.490     | 0.62 (NPV)              | 0.64   |
|                | GLFDVIKKVASVIKKR             | 0.9825              | 0.999  | 0.999  | 0.05<br>(CPP)             | 66.09%             | 0.5424 | 0.115     | 0.77 (PPV)              | 0.58   |
|                | GLFDVIKKVASVIKKLR            | 0.9797              | 0.998  | 1.0    | 0.05<br>(CPP)             | 62.62%             | 0.5225 | 0.302     | 0.50 (PPV)              | 0.56   |
| 17             | <u>FLKKIVKKIKKHIKKAL</u>     | 0.9781              | 1      | 1.000  | 0.05<br>(CPP)             | 53.82%             | 0.9167 | 0.176     | 0.71 (PPV)              | 0.47   |
|                | FLKKIVKKIKKHIKKAR            | 0.9812              | 1      | 1.0    | 0.05<br>(CPP)             | 55.76%             | 0.9412 | 0.103     | 0.82 (PPV)              | 0.47   |
|                | FLKKIVKKIKKHIKKALR           | 0.9801              | 1      | 1.0    | 0.05<br>(CPP)             | 57.08%             | 0.9416 | 0.183     | 0.73 (PPV)              | 0.45   |
| 18             | <u>PAWRKAKRWAWRMLKKA</u>     | 0.9786              | 0.973  | 1.000  | 0.05<br>(CPP)             | 92.01%             | 0.9634 | 0.014     | 0.83 (PPV)              | 0.49   |
|                | PAWRKAKRWAWRMLKKAR           | 0.9787              | 0.912  | 1.0    | 0.05<br>(CPP)             | 93.61%             | 0.9795 | 0.008     | 0.96 (PPV)              | 0.49   |
|                | PAWRKAKRWAWRMLKKAAR          | 0.9795              | 0.961  | 1.0    | 0.05<br>(CPP)             | 93.3%              | 0.9757 | 0.008     | 0.88 (PPV)              | 0.49   |
| 19             | <u>FAKKLAKLKKKLAKLALAL**</u> | 0.9813              | 0.992  | 1.000  | 0.05<br>(CPP)             | 88.47%             | 0.9797 | 0.020     | 0.55 (NPV)              | 0.62   |
|                | FAKKLAKLKKKLAKLALAR          | 0.9829              | 0.986  | 1.0    | 0.05<br>(CPP)             | 90.6%              | 0.9752 | 0.009     | 0.70 (PPV)              | 0.62   |
|                | FAKKLAKLAKKLAKLAKR***        | 0.9806              | 0.999  | 1.0    | 0.05<br>(CPP)             | 92.32%             | 0.9808 | 0.008     | 0.84 (PPV)              | 0.57   |

|    |                             |        |       |       |               |        |        |       |            |      |
|----|-----------------------------|--------|-------|-------|---------------|--------|--------|-------|------------|------|
| 20 | <u>KWKLFKKIGIGLTLPPAKAY</u> | 0.9786 | 0.986 | 0.159 | 0.05<br>(CPP) | 68.97% | 0.6384 | 0.004 | 0.68 (PPV) | 0.48 |
|    | KWKLFKKIGIGLTLPPAKAR        | 0.9781 | 0.908 | 0.251 | 0.05<br>(CPP) | 63.91% | 0.7379 | 0.002 | 0.85 (PPV) | 0.47 |
|    | KWKLFKKIGIGLTLPPAKAYR       | 0.9795 | 0.969 | 0.362 | 0.05<br>(CPP) | 64.03% | 0.7292 | 0.003 | 0.68 (PPV) | 0.50 |

\* Underlined sequences represent aligned template sequences

\*\* AC-P19

\*\*\* AC-P19M

**Table S3. Minimum inhibitory concentration and minimum bactericidal concentration of AC-P19 and AC-P19M**

| <b>Peptide</b> | <i>Escherichia coli</i> |       | <i>Pseudomonas aeruginosa</i> |     | <i>Bacillus subtilis</i> |     |
|----------------|-------------------------|-------|-------------------------------|-----|--------------------------|-----|
|                | MIC*                    | MBC** | MIC                           | MBC | MIC                      | MBC |
| AC-P19         | 1                       | 2     | 4                             | 8   | 2                        | 2   |
| AC-P19M        | 4                       | 32    | 1                             | 2   | 1                        | 1   |

\* Minimum inhibitory concentration (μM)

\*\* Minimum bactericidal concentration (μM)

Figure S1. Three-dimensional modeling of AC-P19 and AC-P19M

**A**

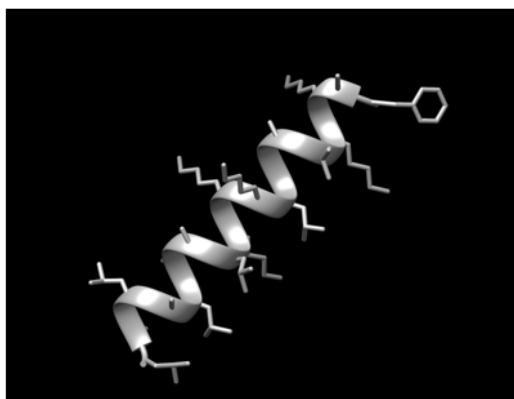

AC-P19

**B**

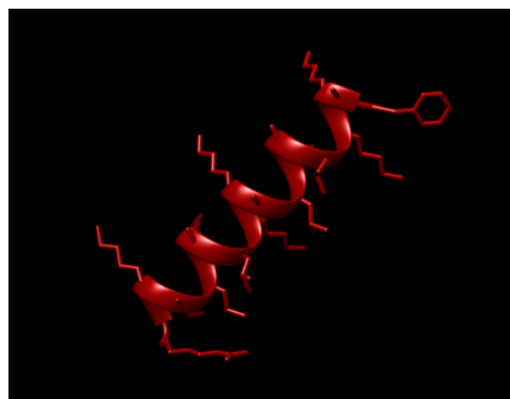

AC-P19M

Figure S2. Cell cycle assay of A549 and H460 upon AC-P19M treatment

**A**

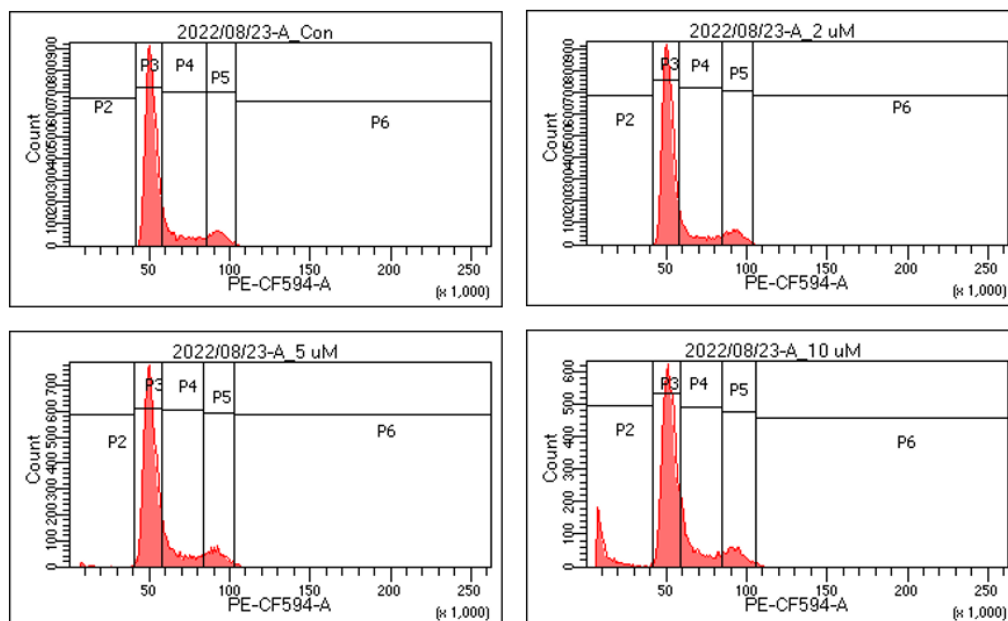

**B**

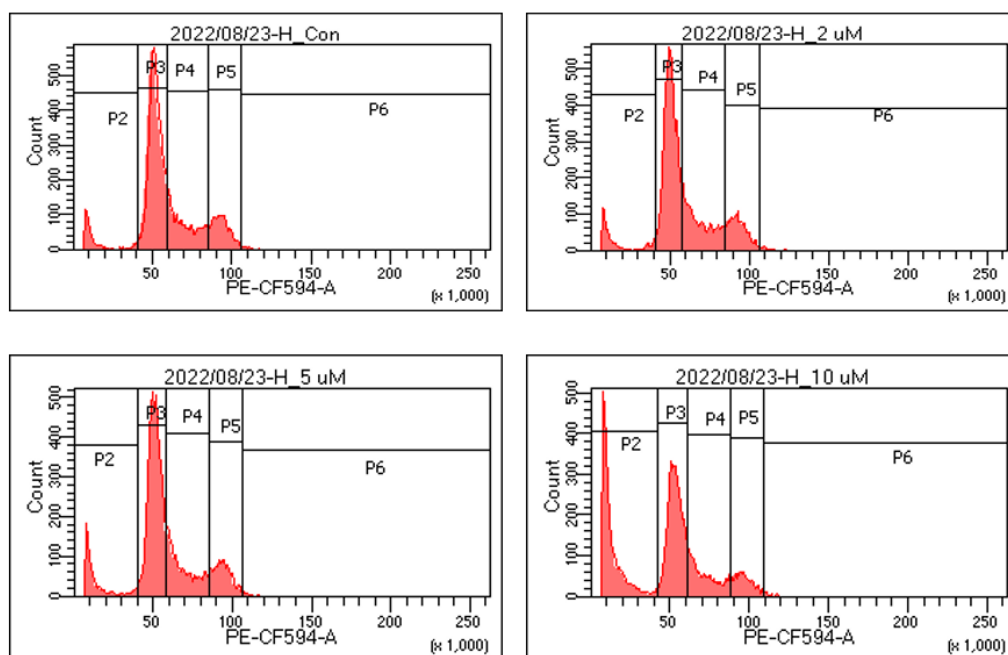

**Figure S3. Field emission-scanning electron imaging of bacteria upon AC-P19M treatment**

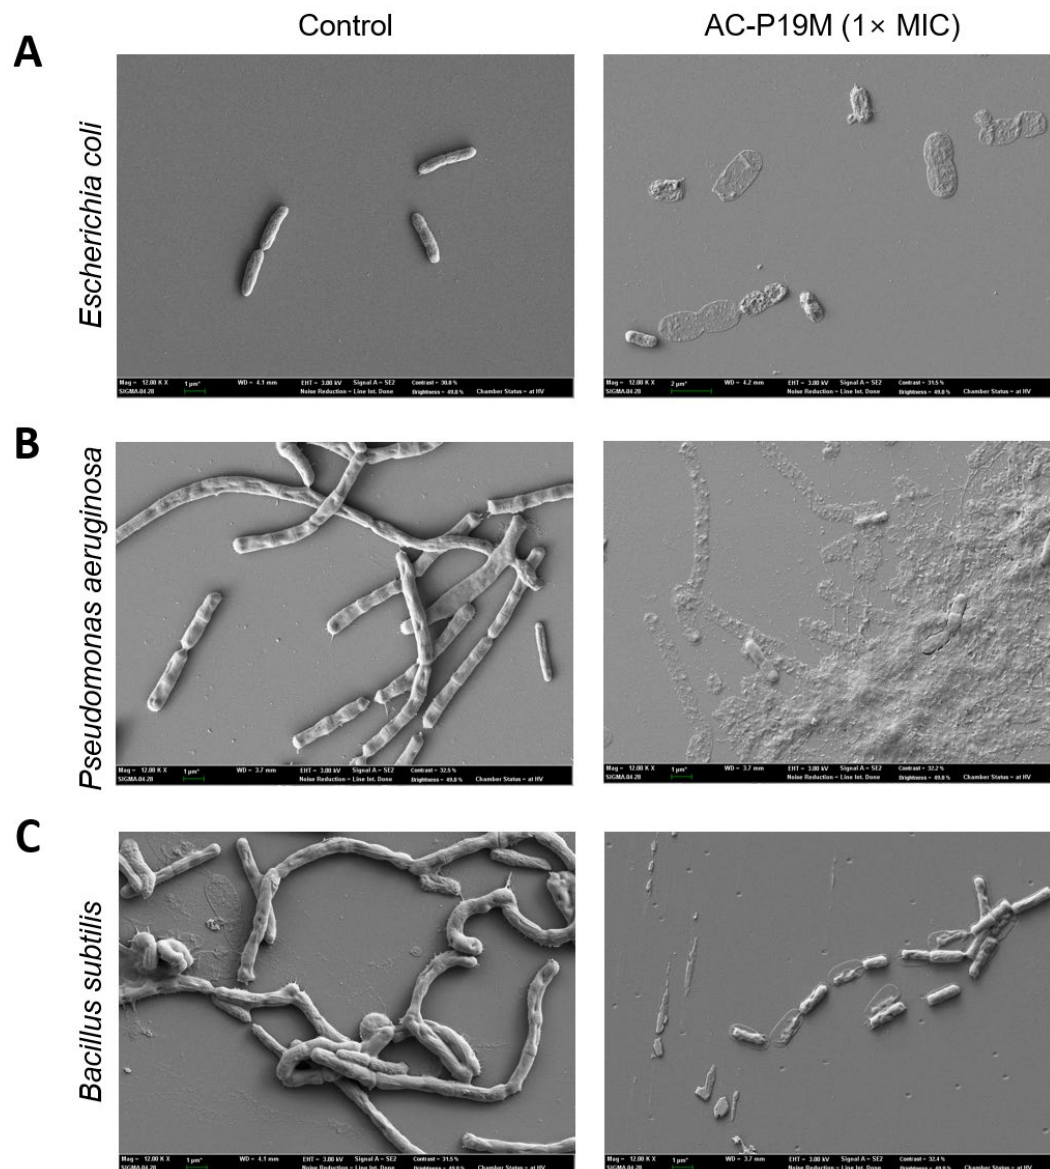

Supplement: s1 [file s1]
